# Supplementary material
Source: PubMed Central journal article supplement (PMC6165692)
Supplement: NIHMS981664-supplement-Supporting_Information.pdf [file NIHMS981664-supplement-Supporting_Information.pdf]

# Supporting Information

## Model-based detection and analysis of introgressed Neanderthal ancestry in modern humans

Matthias Steinrücken<sup>1,2,3</sup>, Jeffrey P. Spence<sup>4</sup>, John A. Kamm<sup>5</sup>, Emilia Wiczorek<sup>6</sup>, and Yun S. Song<sup>3,5,7</sup>

<sup>1</sup>Department of Ecology and Evolution, University of Chicago

<sup>2</sup>Department of Biostatistics and Epidemiology, University of Massachusetts, Amherst

<sup>3</sup>Department of EECS, University of California, Berkeley

<sup>4</sup>Computational Biology Graduate Group, University of California, Berkeley

<sup>5</sup>Department of Statistics, University of California, Berkeley

<sup>6</sup>Department of Mathematics, University of California, Berkeley

<sup>7</sup>Chan Zuckerberg Biohub, San Francisco

February 14, 2018

### S1 Gene Ontology Analysis Results

All Gene Ontology categories with an FDR  $q$  value, as reported by GOrilla (Eden et al., 2007, 2009), less than 0.05 are reported in Tables S1, S2, S3, and S4. We note that GOrilla does not properly account for spatial correlations or uncertainty in our mean posterior introgression probabilities and so the reported  $q$  values may be anticonservative.

| GO Category | GO ID      | Description                                                            | FDR q-value            |
|-------------|------------|------------------------------------------------------------------------|------------------------|
| Process:    | GO:0050907 | detection of chemical stimulus involved in sensory perception          | $2.72 \times 10^{-28}$ |
|             | GO:0050911 | detection of chemical stimulus involved in sensory perception of smell | $6.64 \times 10^{-28}$ |
|             | GO:0009593 | detection of chemical stimulus                                         | $2.6 \times 10^{-27}$  |
|             | GO:0050906 | detection of stimulus involved in sensory perception                   | $1.21 \times 10^{-24}$ |
|             | GO:0051606 | detection of stimulus                                                  | $4.01 \times 10^{-17}$ |
|             | GO:0007186 | G-protein coupled receptor signaling pathway                           | $4.71 \times 10^{-13}$ |
| Function:   | GO:0007608 | sensory perception of smell                                            | $3.31 \times 10^{-6}$  |
|             | GO:0007606 | sensory perception of chemical stimulus                                | $8.09 \times 10^{-5}$  |
|             | GO:0004984 | olfactory receptor activity                                            | $3.98 \times 10^{-28}$ |
|             | GO:0004930 | G-protein coupled receptor activity                                    | $5.59 \times 10^{-17}$ |
|             | GO:0005549 | odorant binding                                                        | $1.3 \times 10^{-13}$  |
|             | GO:0004888 | transmembrane signaling receptor activity                              | $5.34 \times 10^{-10}$ |
|             | GO:0099600 | transmembrane receptor activity                                        | $4.51 \times 10^{-10}$ |
|             | GO:0038023 | signaling receptor activity                                            | $4.71 \times 10^{-9}$  |
|             | GO:0004872 | receptor activity                                                      | $7.19 \times 10^{-7}$  |
|             | GO:0060089 | molecular transducer activity                                          | $9.93 \times 10^{-7}$  |
|             | GO:0004871 | signal transducer activity                                             | $1.76 \times 10^{-6}$  |
|             | GO:0045236 | CXCR chemokine receptor binding                                        | 0.0273                 |

Table S1: Gene ontology terms associated with lack of introgression in CHB+CHS

| GO Category | GO ID      | Description                                                            | FDR q-value           |
|-------------|------------|------------------------------------------------------------------------|-----------------------|
| Process:    | GO:0050907 | detection of chemical stimulus involved in sensory perception          | $1.11 \times 10^{-9}$ |
|             | GO:0009593 | detection of chemical stimulus                                         | $7.21 \times 10^{-9}$ |
|             | GO:0050906 | detection of stimulus involved in sensory perception                   | $1.41 \times 10^{-8}$ |
|             | GO:0050911 | detection of chemical stimulus involved in sensory perception of smell | $1.11 \times 10^{-7}$ |
|             | GO:0051606 | detection of stimulus                                                  | $2.7 \times 10^{-5}$  |
|             | GO:0007608 | sensory perception of smell                                            | $1.34 \times 10^{-3}$ |
|             | GO:0007606 | sensory perception of chemical stimulus                                | $3.04 \times 10^{-3}$ |
| Function:   | GO:0018149 | peptide cross-linking                                                  | 0.0178                |
|             | GO:0004984 | olfactory receptor activity                                            | $1.33 \times 10^{-7}$ |
|             | GO:0004930 | G-protein coupled receptor activity                                    | $6.29 \times 10^{-4}$ |
|             | GO:0045236 | CXCR chemokine receptor binding                                        | $1.44 \times 10^{-3}$ |
|             | GO:0033038 | bitter taste receptor activity                                         | 0.0143                |

Table S2: Gene ontology terms associated with lack of introgression in CEU

| GO Category | GO ID      | Description                                                            | FDR q-value           |
|-------------|------------|------------------------------------------------------------------------|-----------------------|
| Process:    | GO:0071493 | cellular response to UV-B                                              | $1.5 \times 10^{-3}$  |
|             | GO:0030214 | hyaluronan catabolic process                                           | $7.99 \times 10^{-3}$ |
|             | GO:0010224 | response to UV-B                                                       | 0.0103                |
|             | GO:0045926 | negative regulation of growth                                          | 0.0355                |
|             | GO:0060337 | type I interferon signaling pathway                                    | 0.0314                |
|             | GO:0030212 | hyaluronan metabolic process                                           | 0.0288                |
|             | GO:0033141 | positive regulation of peptidyl-serine phosphorylation of STAT protein | 0.038                 |
|             | GO:0033139 | regulation of peptidyl-serine phosphorylation of STAT protein          | 0.0424                |
|             | GO:0071482 | cellular response to light stimulus                                    | 0.0452                |
|             | GO:0061099 | negative regulation of protein tyrosine kinase activity                | 0.0409                |
| Function:   | GO:0004415 | hyaluronoglucosaminidase activity                                      | $2.37 \times 10^{-4}$ |
|             | GO:0005132 | type I interferon receptor binding                                     | $4.4 \times 10^{-4}$  |
|             | GO:0015929 | hexosaminidase activity                                                | $1.2 \times 10^{-3}$  |
|             | GO:0033906 | hyaluronoglucuronidase activity                                        | $1.14 \times 10^{-3}$ |
|             | GO:0031433 | telethonin binding                                                     | 0.0177                |

Table S3: Gene ontology terms associated with enrichment of introgression in CHB+CHS

| GO Category | GO ID      | Description                                                            | FDR q-value            |
|-------------|------------|------------------------------------------------------------------------|------------------------|
| Process:    | GO:0050911 | detection of chemical stimulus involved in sensory perception of smell | $3.32 \times 10^{-9}$  |
|             | GO:0050907 | detection of chemical stimulus involved in sensory perception          | $1.13 \times 10^{-7}$  |
|             | GO:0009593 | detection of chemical stimulus                                         | $1.14 \times 10^{-7}$  |
|             | GO:0050906 | detection of stimulus involved in sensory perception                   | $1.14 \times 10^{-6}$  |
|             | GO:0051606 | detection of stimulus                                                  | $2.7 \times 10^{-5}$   |
|             | GO:0007186 | G-protein coupled receptor signaling pathway                           | $2.65 \times 10^{-3}$  |
|             | GO:0006342 | chromatin silencing                                                    | 0.0399                 |
| Function:   | GO:0005549 | odorant binding                                                        | $9.43 \times 10^{-13}$ |
|             | GO:0004984 | olfactory receptor activity                                            | $4.97 \times 10^{-10}$ |
|             | GO:0001730 | 2'-5'-oligoadenylate synthetase activity                               | $5.41 \times 10^{-6}$  |
|             | GO:0004930 | G-protein coupled receptor activity                                    | $9.2 \times 10^{-5}$   |
|             | GO:0004950 | chemokine receptor activity                                            | 0.0122                 |
|             | GO:0001637 | G-protein coupled chemoattractant receptor activity                    | 0.0102                 |
|             | GO:0015125 | bile acid transmembrane transporter activity                           | 0.0104                 |
|             | GO:0070566 | adenylyltransferase activity                                           | 0.033                  |
| Component:  | GO:0004715 | non-membrane spanning protein tyrosine kinase activity                 | 0.0421                 |
|             | GO:0000786 | nucleosome                                                             | $2.49 \times 10^{-7}$  |
|             | GO:0044815 | DNA packaging complex                                                  | $7.36 \times 10^{-7}$  |
|             | GO:0032993 | protein-DNA complex                                                    | $2.49 \times 10^{-4}$  |
|             | GO:0017101 | aminoacyl-tRNA synthetase multienzyme complex                          | $5.27 \times 10^{-3}$  |
|             | GO:0045095 | keratin filament                                                       | 0.0287                 |

Table S4: Gene ontology terms associated with enrichment of introgression in CEU

## S2 Simulation Study

Here we present some results of the simulation study we performed to assess the accuracy of our method.

### S2.1 ROC and Precision-Recall Curves from Simulated Data

ROC and Precision-recall curves for data simulated under different models, and analyzed using the same model as simulated and the “true” model.

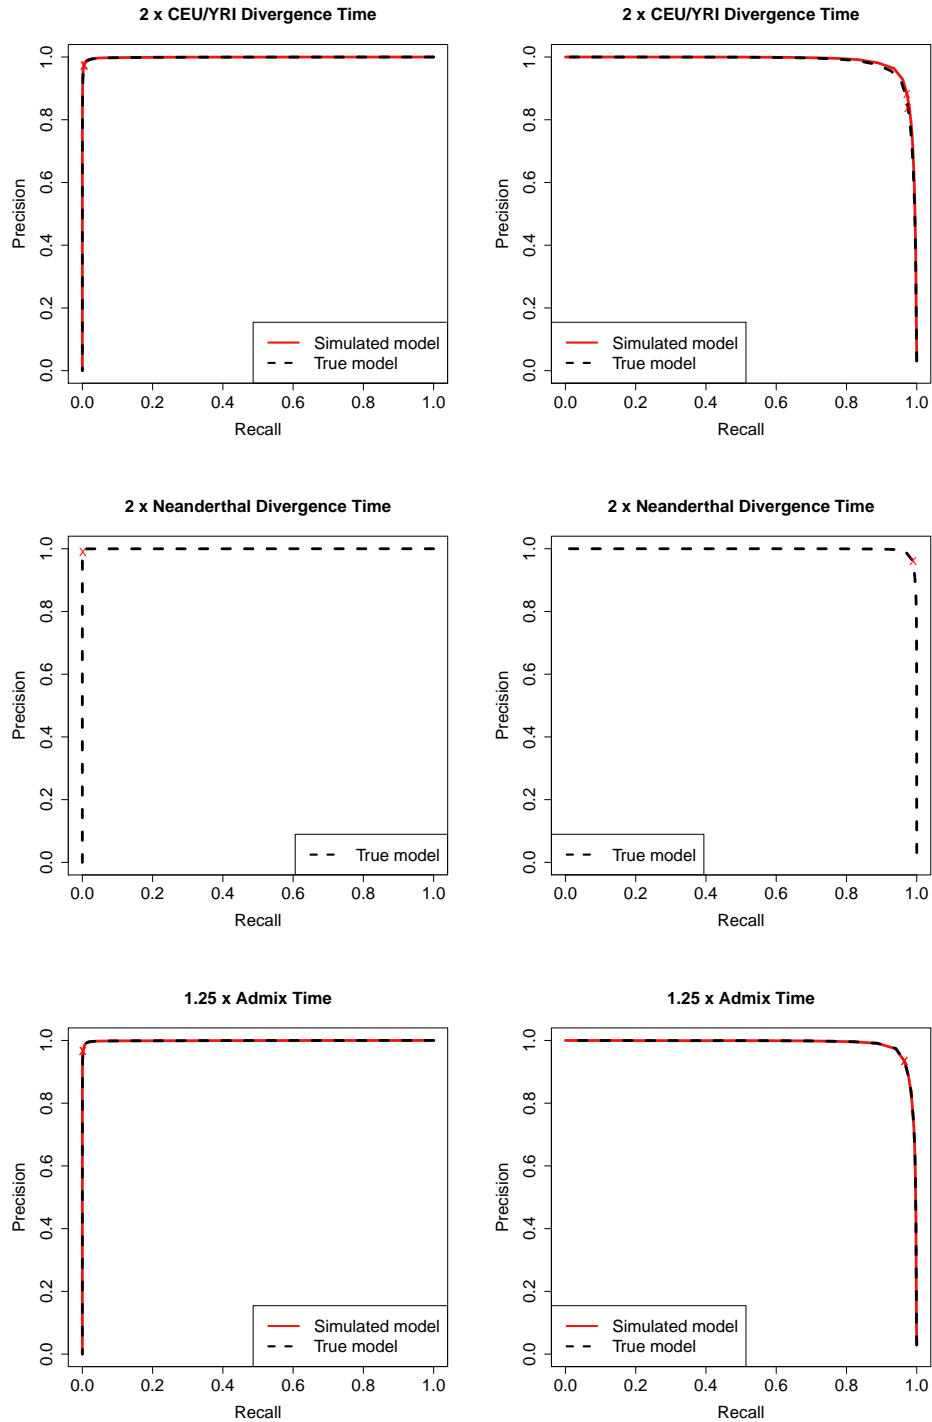

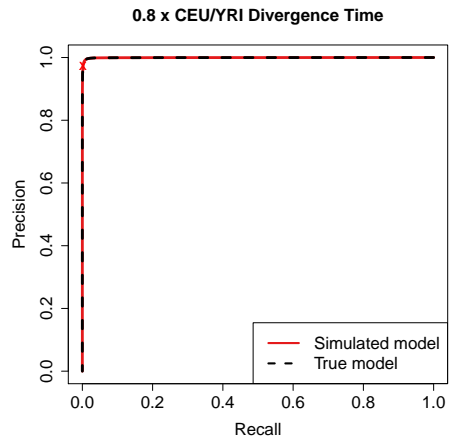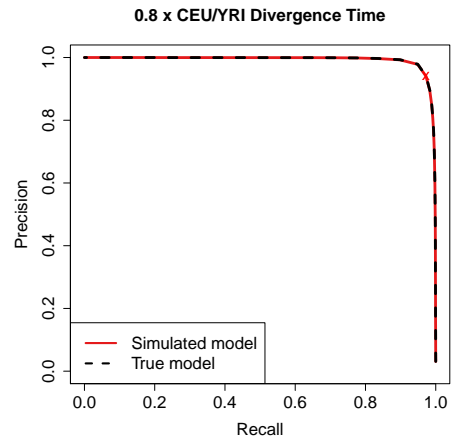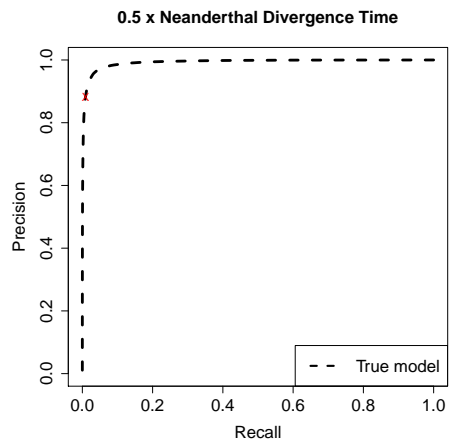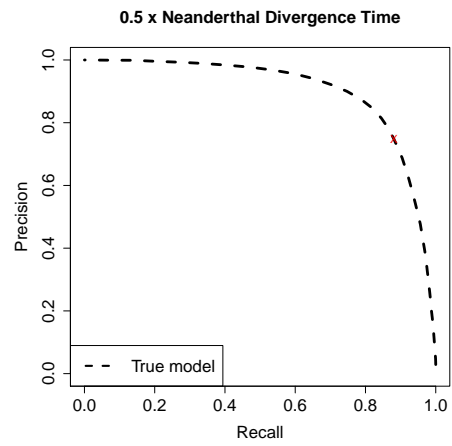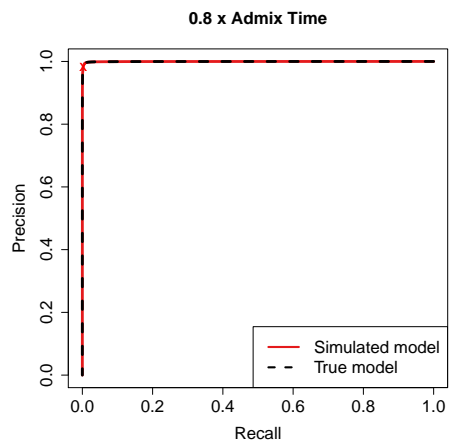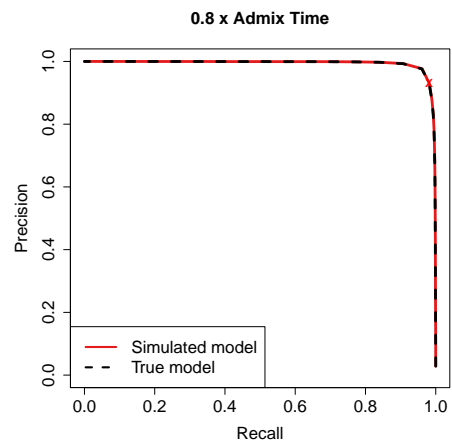

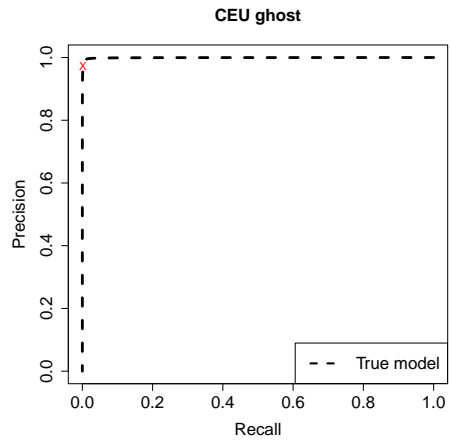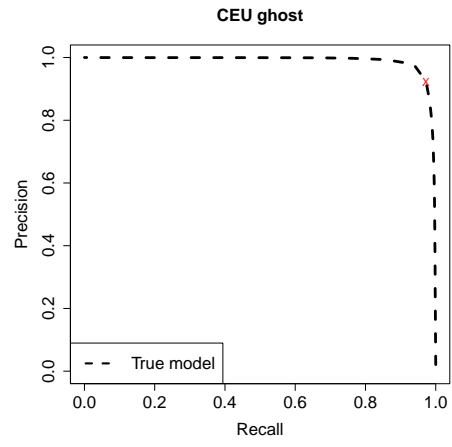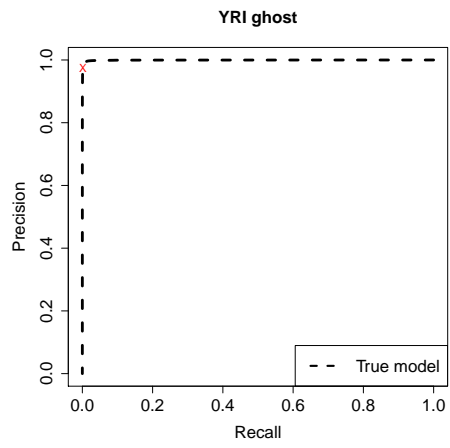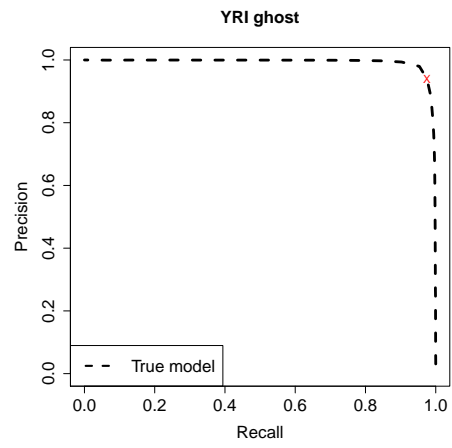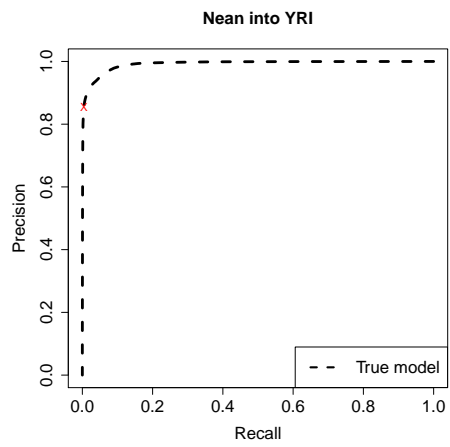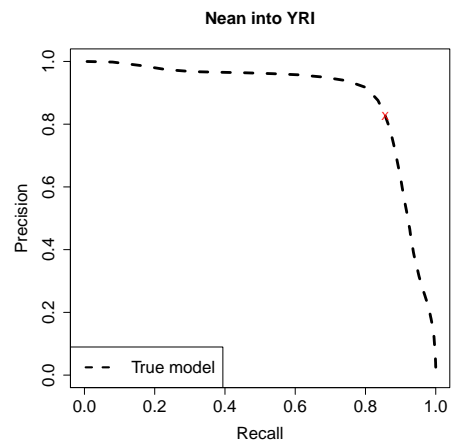

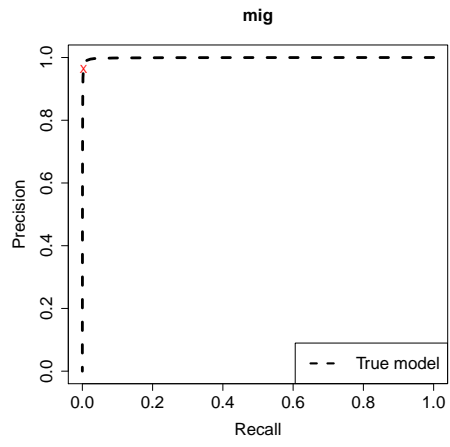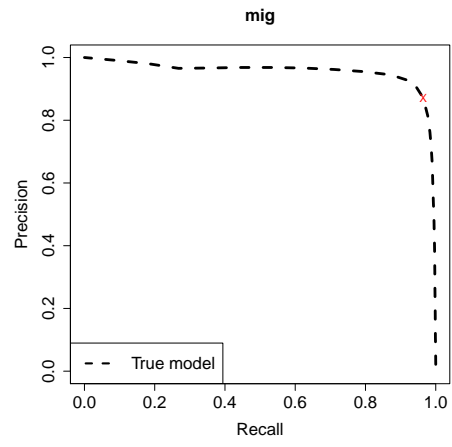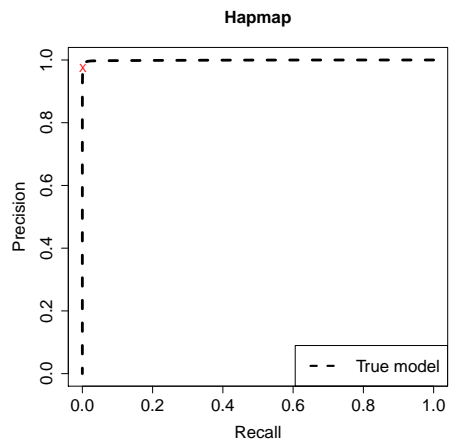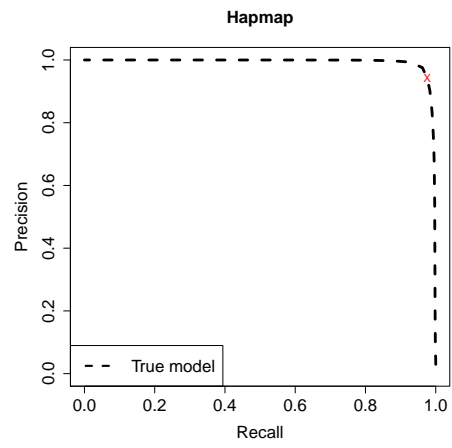

## S2.2 Power as a function of tract length

Here we use the marginal posterior obtained from analyzing the data simulated under the true “model”, using the “true” model in the analysis. We categorized the introgressed fragments by their length, and plot the percentage of correctly called bases for tracts of a certain length:

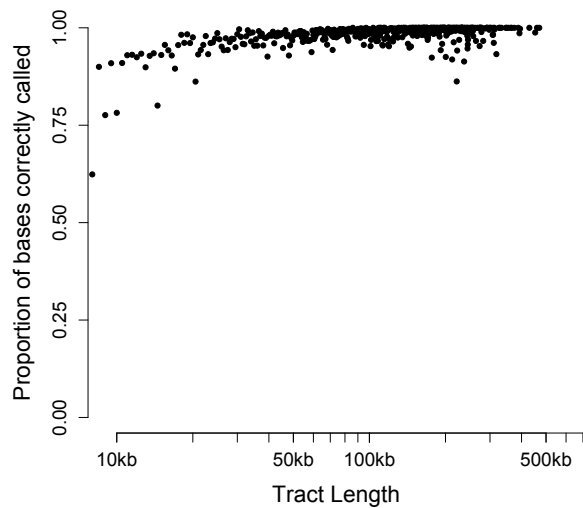



## S3 Fine-scale Population Average Introgression

### S3.1 CEU

Skyline plot of the amount of Neanderthal introgression in the CEU population on the different chromosomes, averaged over all individuals in 1 Mbp windows. The results from *diCal* are indicated in blue, and the results from Sankararaman et al. (2014) indicated in red. The regions reported as introgressed by Vernot and Akey (2014) are indicated in green. The gray bars denote the regions where no calls were made in the 1000 genomes dataset, which include the centromeres.

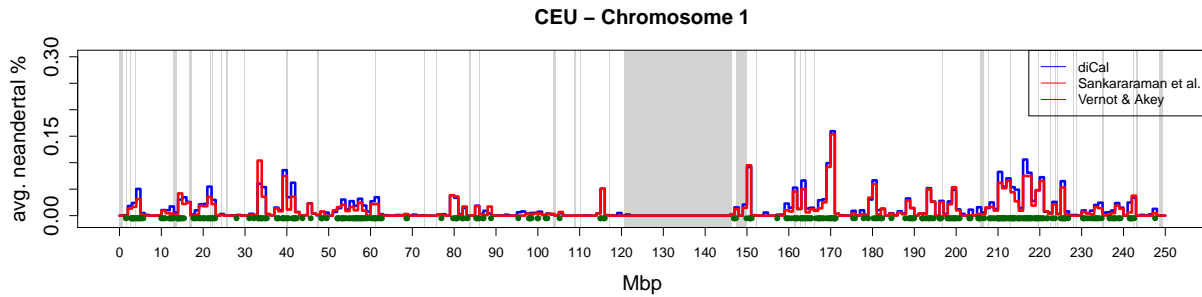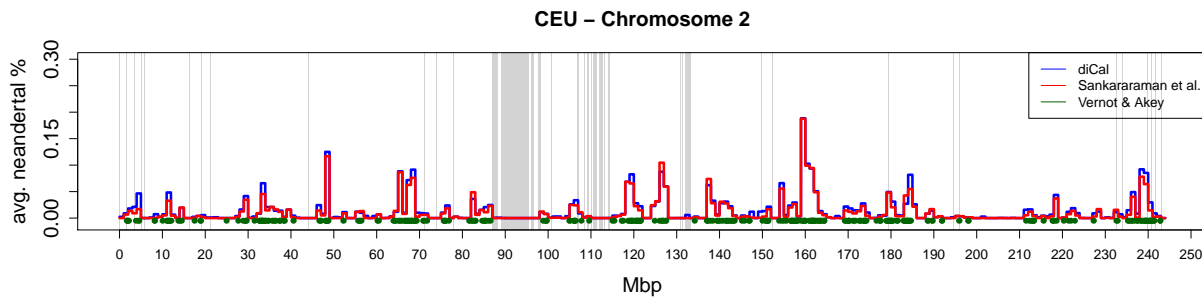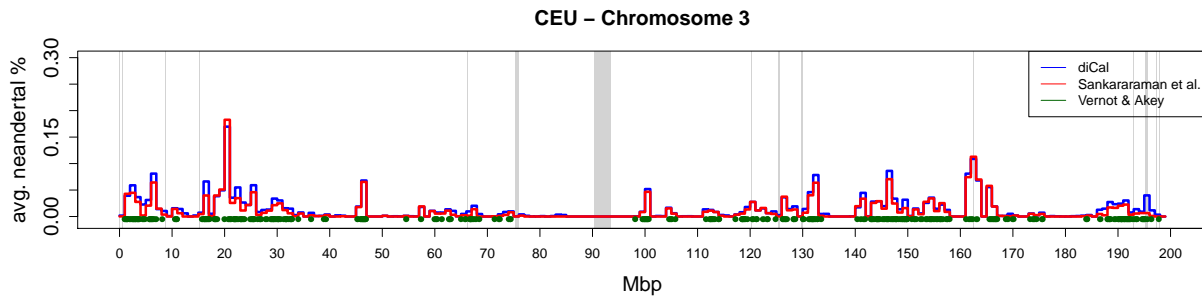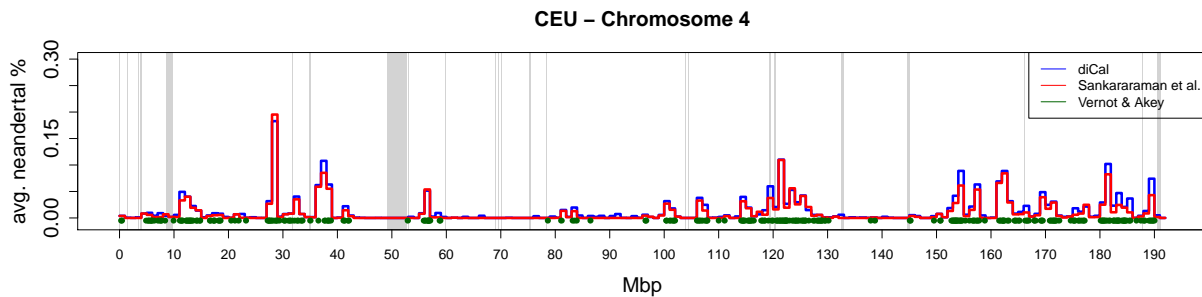

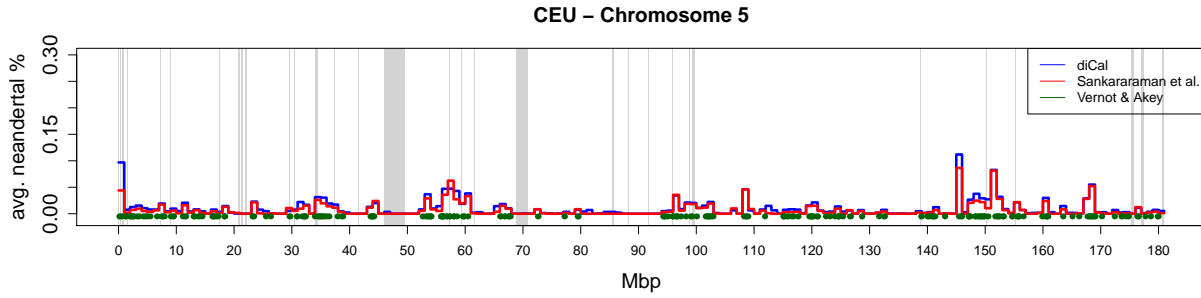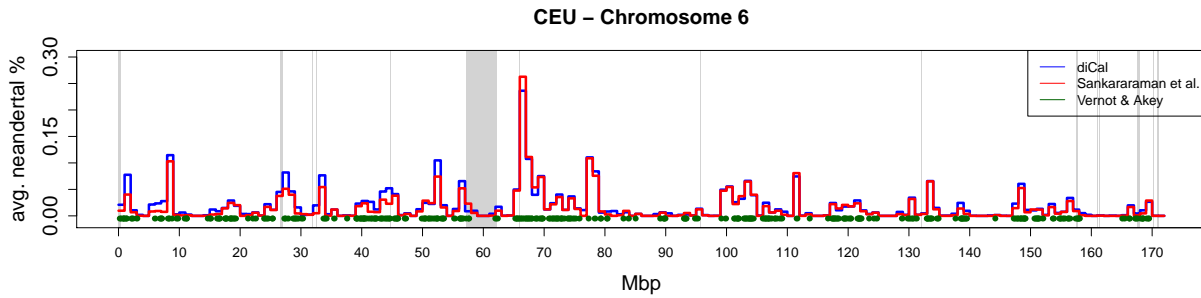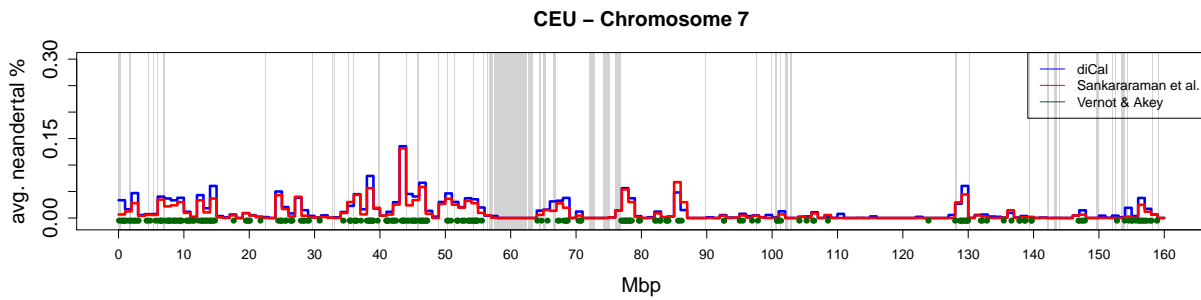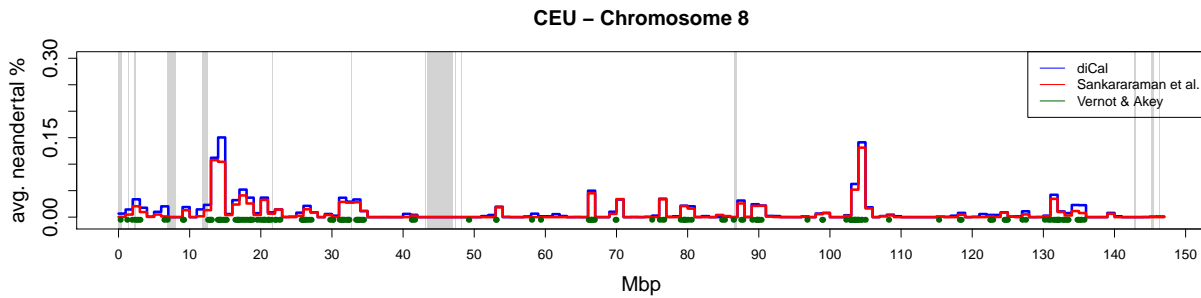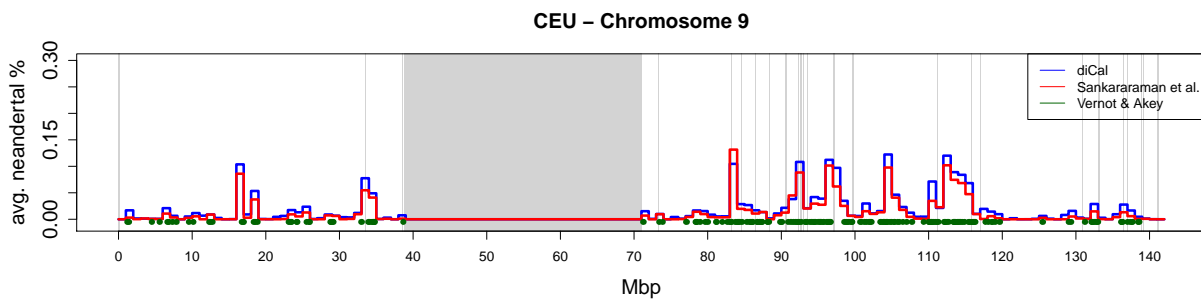

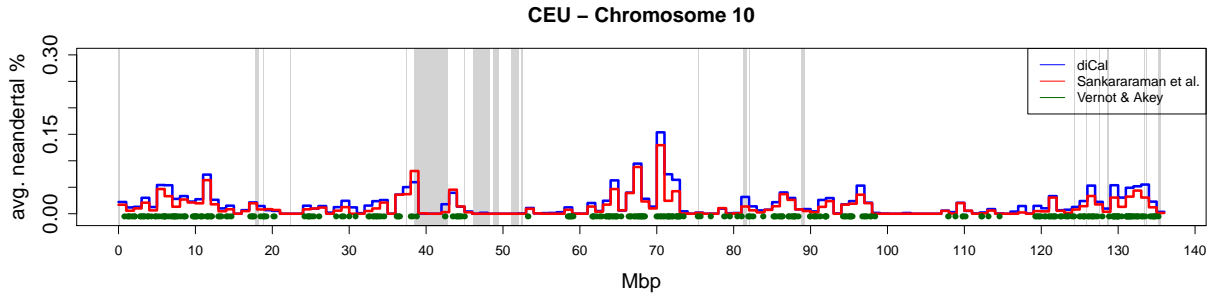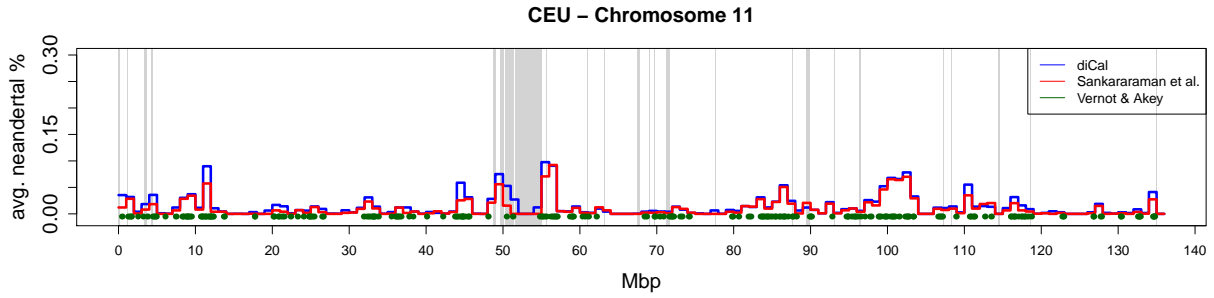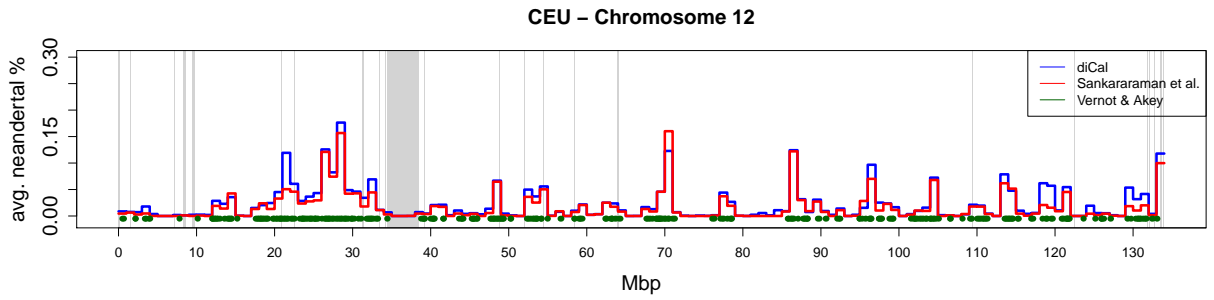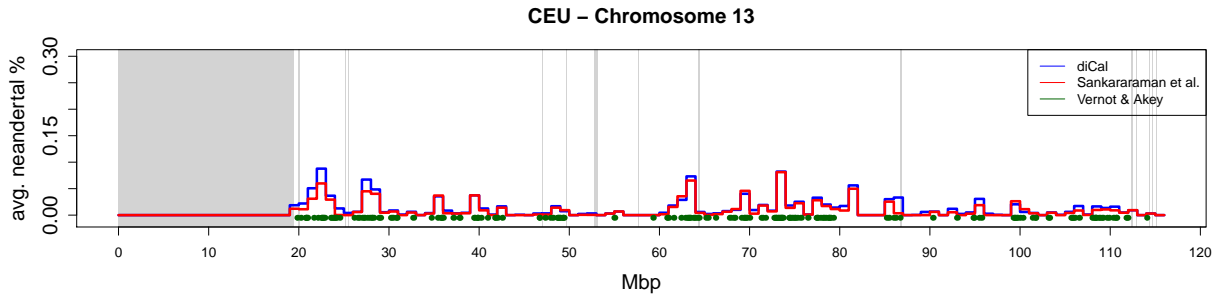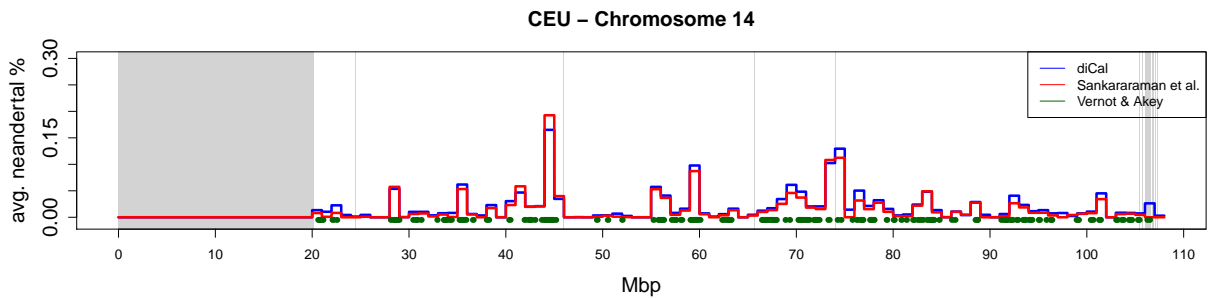

CEU – Chromosome 15

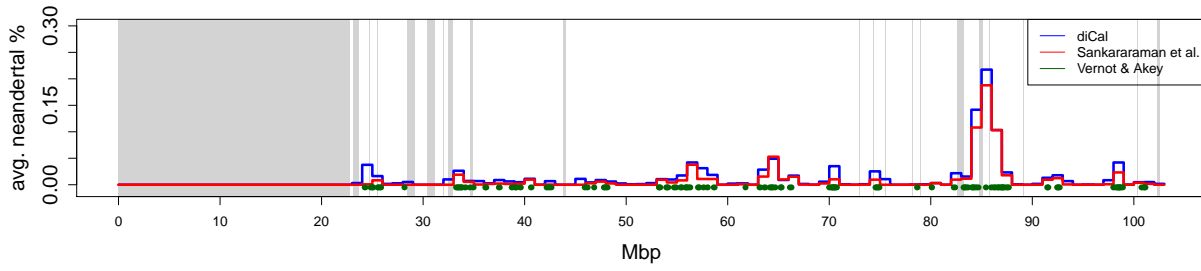

CEU – Chromosome 16

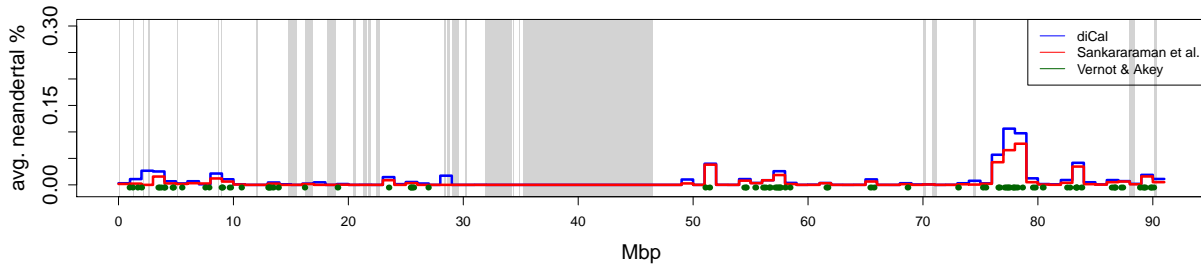

CEU – Chromosome 17

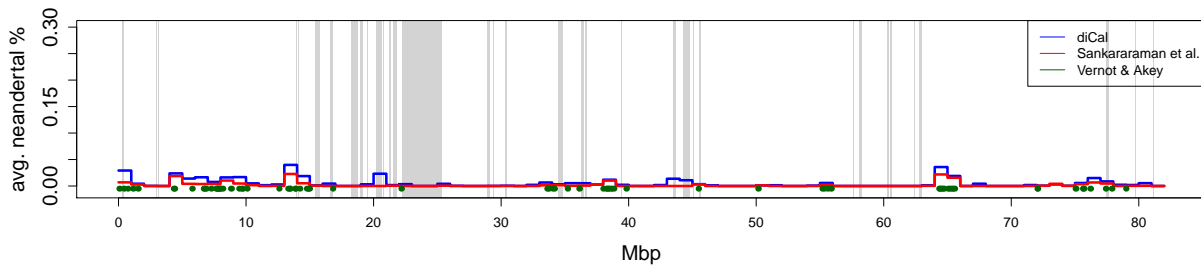

CEU – Chromosome 18

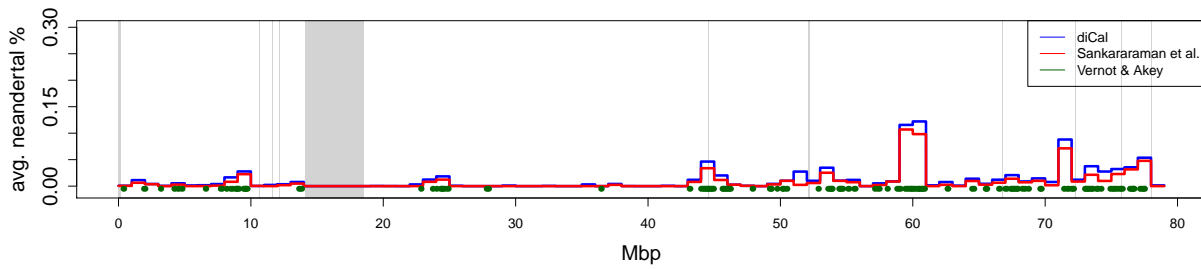

CEU – Chromosome 19

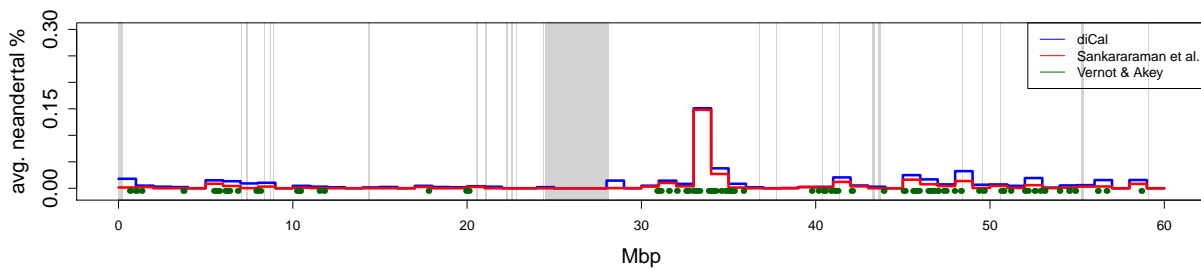

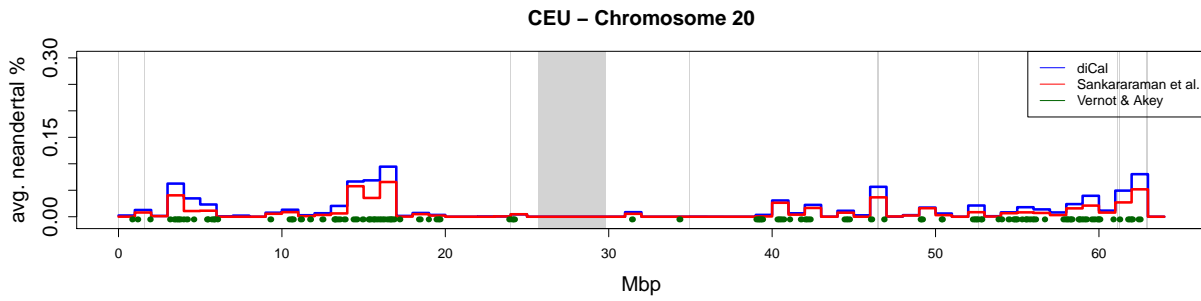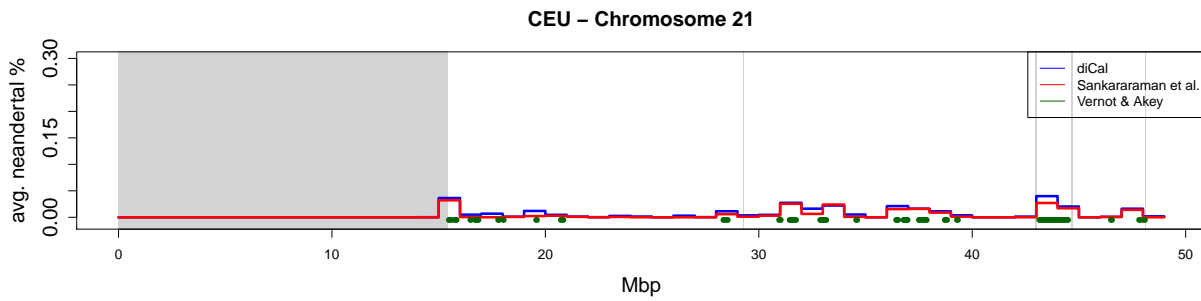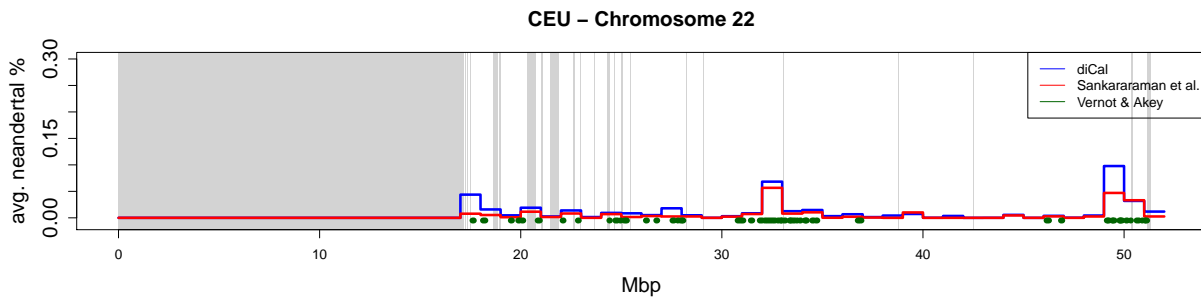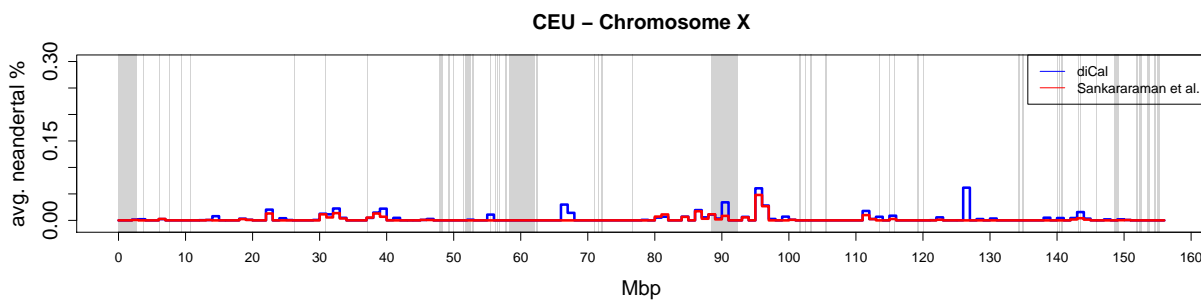

### S3.2 CHB+CHS

Skyline plot of the amount of Neanderthal introgression in the individuals of the CHB and CHS population on the different chromosomes, averaged over all individuals in 1 Mbp windows. The results from *diCal* are indicated in blue, and the results from Sankararaman et al. (2014) indicated in red. The regions reported as introgressed by Vernot and Akey (2014) are indicated in green. The gray bars denote the regions where no calls were made in the 1000 genomes dataset, which include the centromeres.

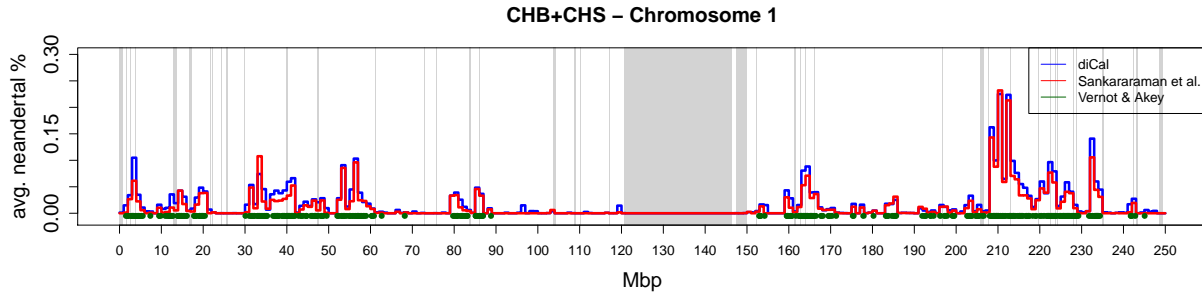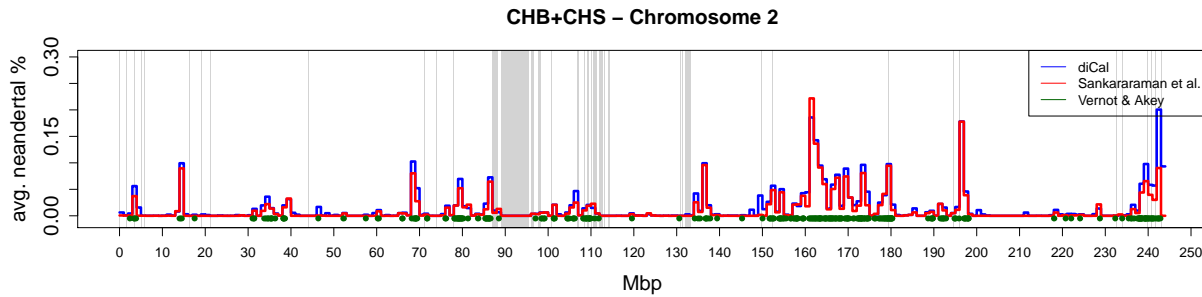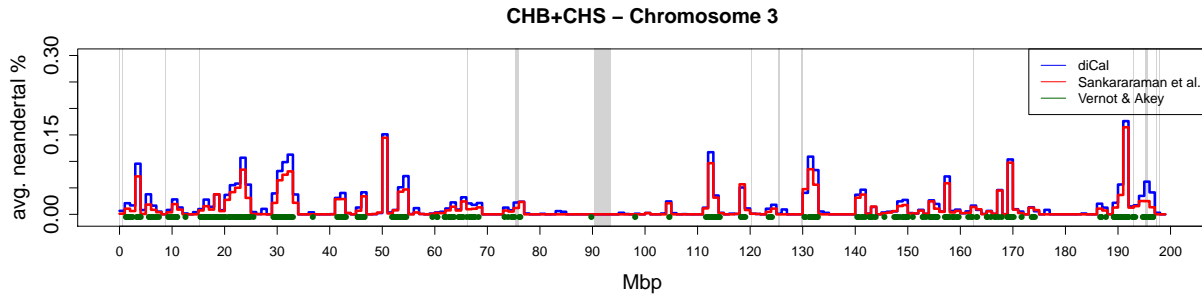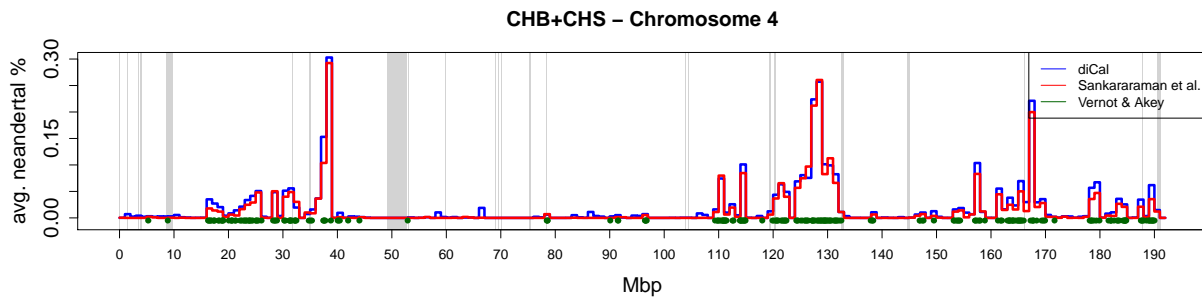

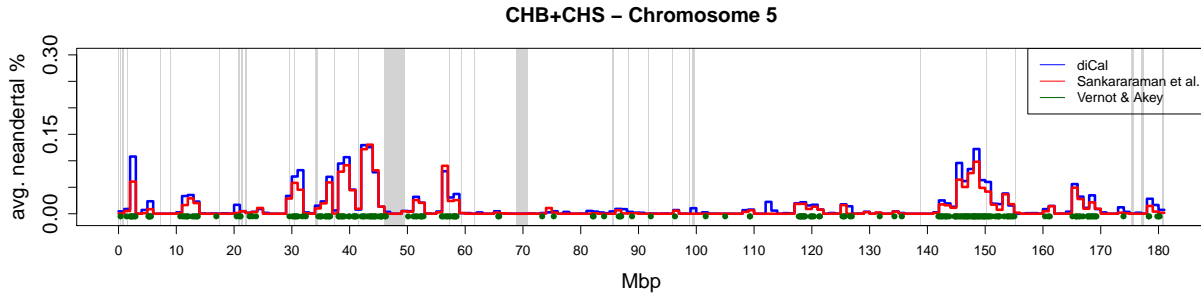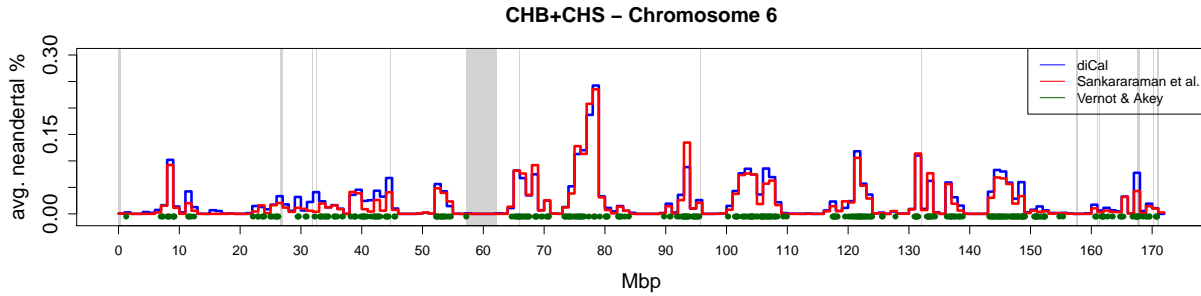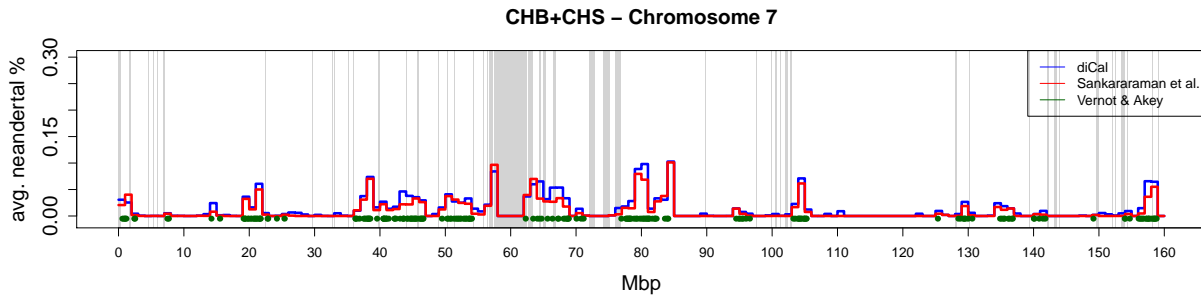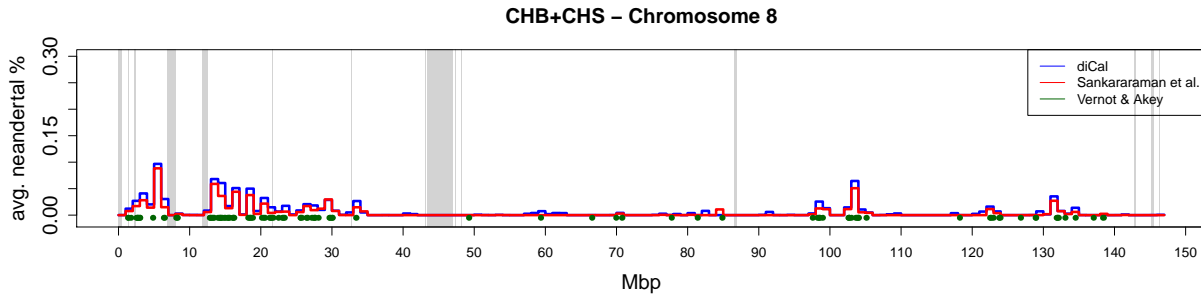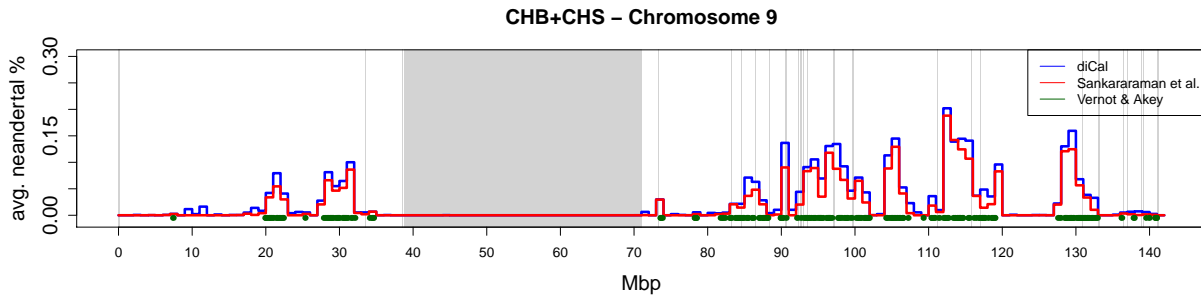

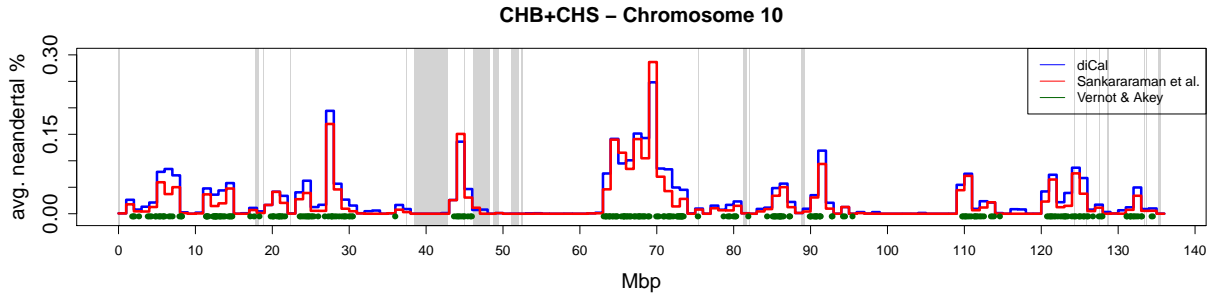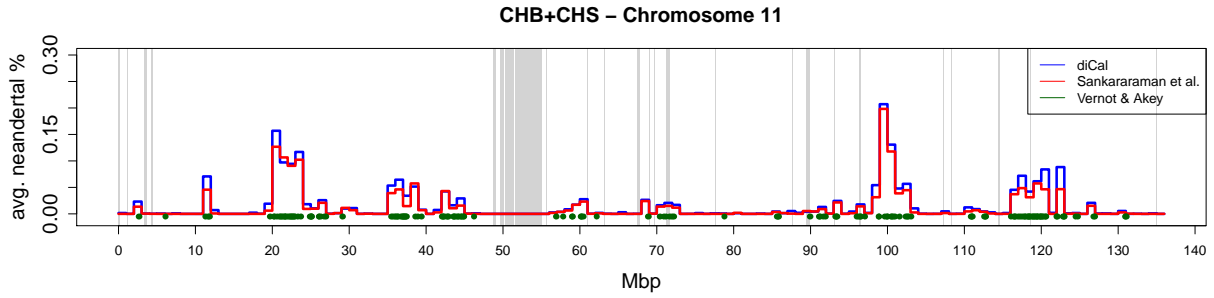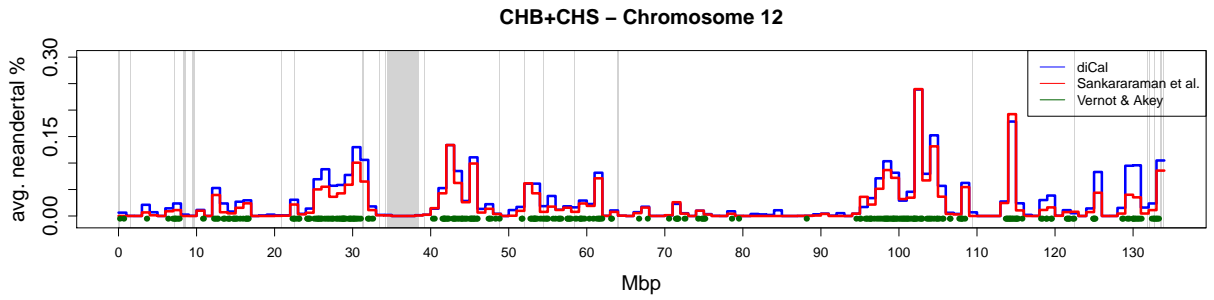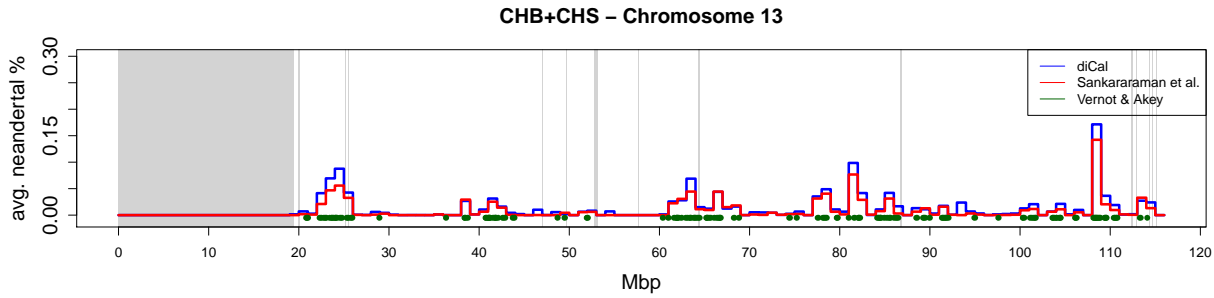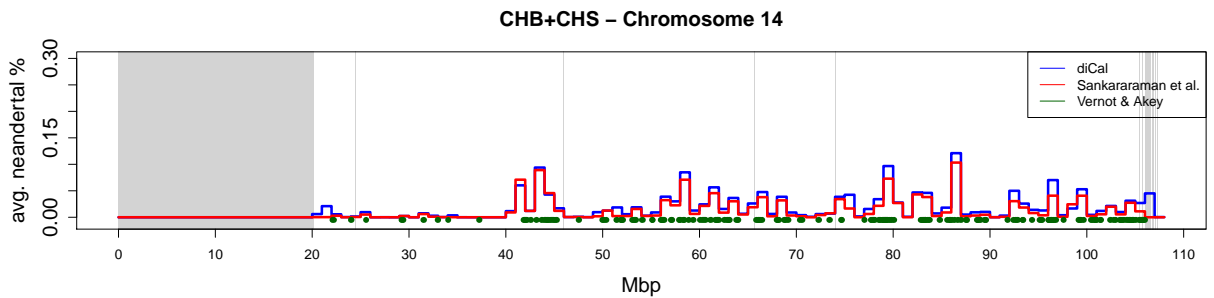



CHB+CHS – Chromosome 15

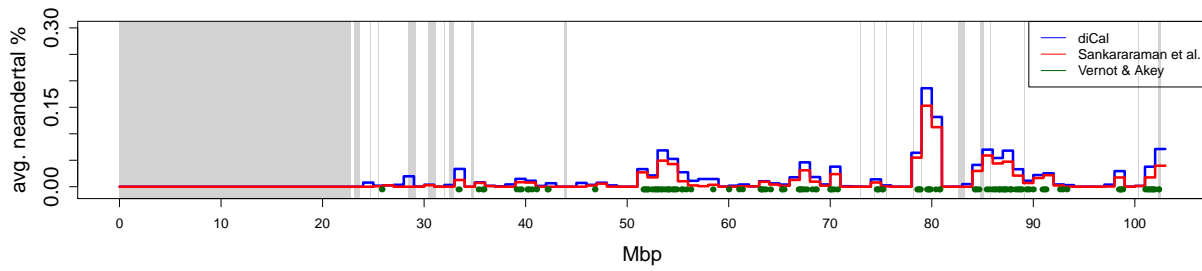

CHB+CHS – Chromosome 16

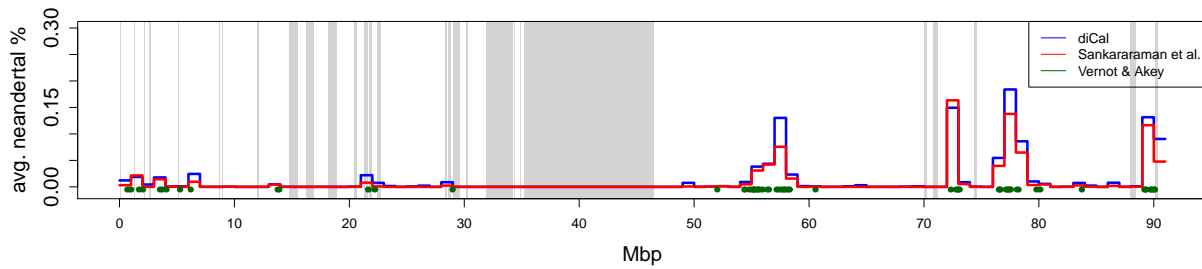

CHB+CHS – Chromosome 17

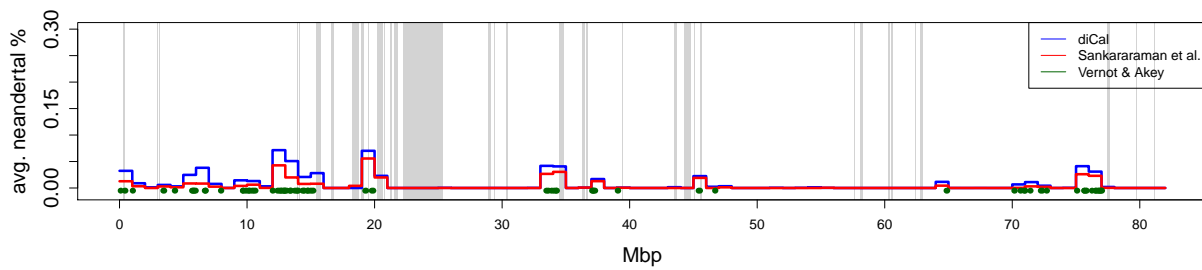

CHB+CHS – Chromosome 18

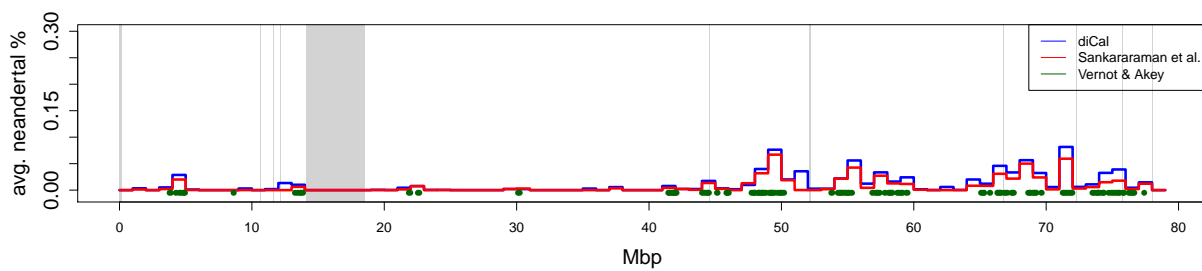

CHB+CHS – Chromosome 19

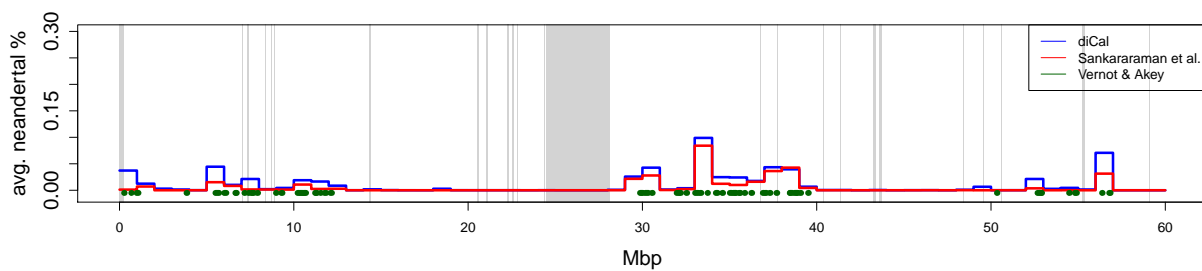

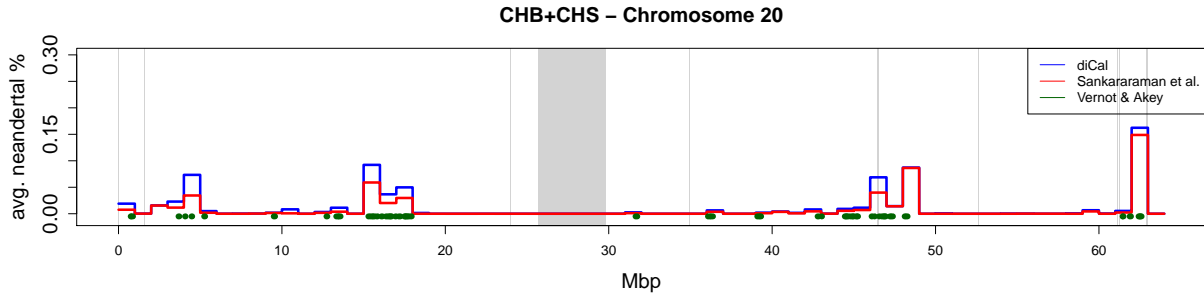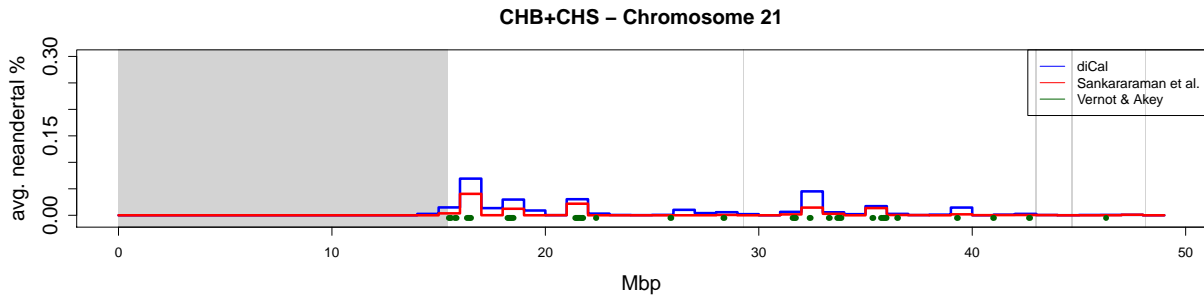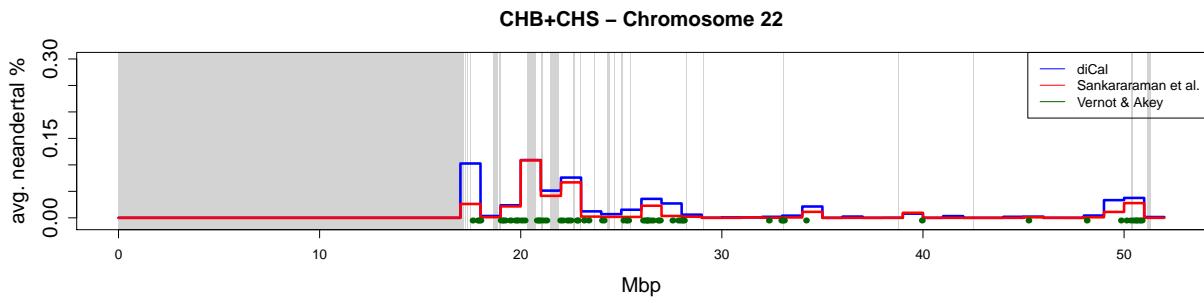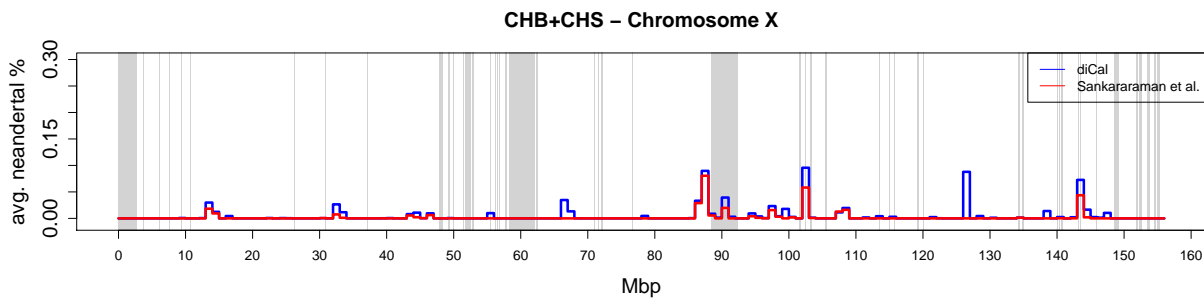

## References

- Eden, E., Lipson, D., Yagev, S., and Yakhini, Z. (2007). Discovering motifs in ranked lists of dna sequences. *PLoS Computational Biology*, **3**,(3) 1–15.
- Eden, E., Navon, R., Steinfeld, I., Lipson, D., and Yakhini, Z. (2009). Gorilla: a tool for discovery and visualization of enriched go terms in ranked gene lists. *BMC Bioinformatics*, **10**,(1) 48.
- Sankararaman, S., Mallick, S., Dannemann, M., Prufer, K., Kelso, J., Paabo, S., Patterson, N., and Reich, D. (2014). The genomic landscape of neanderthal ancestry in present-day humans. *Nature*, **507**,(7492) 354–357.
- Vernot, B. and Akey, J. M. (2014). Resurrecting surviving neandertal lineages from modern human genomes. *Science*, **343**,(6174) 1017–1021.
